# Supplementary material for: Progressive interstitial lung disease in patients with systemic sclerosis-associated interstitial lung disease in the EUSTAR database
Source: HighWire-hosted journal article supplement (doi:10.1136/annrheumdis-2020-217455), 2020-09-28
Supplement: annrheumdis-2020-217455supp001_data_supplement.pdf [file annrheumdis-2020-217455supp001_data_supplement.pdf]

Revision July 2020

Confidential

EUSTAR SSc-ILD Progression

## Supplementary material

### Progressive interstitial lung disease measured by forced vital capacity changes in combination with diffusion capacity of the lungs for carbon monoxide changes over 12-month periods

A decline in forced vital capacity (FVC) of  $\geq 10\%$ , or a decline in FVC of 5–10% along with a decline in diffusion capacity of the lungs for carbon monoxide (DL<sub>CO</sub>) of 15%, is a proposed definition of progressive fibrosis in patients with interstitial lung disease (ILD), and is predictive of mortality in patients with systemic sclerosis (SSc)-ILD.[8, 31] We therefore also assessed the prevalence of this combined endpoint.

#### Materials and methods

Patients were divided into five progressive ILD subgroups based on absolute change in FVC and DL<sub>CO</sub> (% predicted) during the initial 12 $\pm$ 3-month period: significant progression (FVC decline of  $>10\%$ , or FVC decline of 5–10% with DL<sub>CO</sub> decline of  $\geq 15\%$ ); moderate progression (FVC decline of 5–10% with DL<sub>CO</sub> decline of  $<15\%$ ); stable ILD (FVC decline or improvement of  $<5\%$ ); moderate improvement (FVC improvement of 5–10% with DL<sub>CO</sub> improvement of  $<15\%$ ); and significant improvement (FVC improvement of  $>10\%$ , or FVC improvement of 5–10% with DL<sub>CO</sub> improvement of  $\geq 15\%$ ).

Further changes in lung function were evaluated in patients with available data over a mean follow-up of 5 years, using the definitions of progressive ILD described above.

#### Results

Among the 826 eligible patients with pulmonary function data over the initial 12 $\pm$ 3-month period, 113 (14%) had significant ILD progression, 106 (13%) had moderate progression, 408 (49%) were stable, 189 (23%) had moderate improvement, and 10 (1%) had significant improvement (Table S1).

In multivariable logistic regression analyses, higher FVC (odds ratio (OR) 1.03; 95% confidence interval (CI) 1.02–1.04), shorter disease duration (OR 0.97; 95% CI 0.97–0.98), higher erythrocyte sedimentation rate (OR 1.02; 95% CI 1.01–1.02), and presence of reflux/dysphagia symptoms (OR 1.71; 95% CI 1.03–2.84; Figure S1B) were predictive for significant progressive ILD at 12 $\pm$ 3 months. Older age, male sex, antibody profile and SSc subtype were not predictive. Further ILD progression over the 5-year follow-up (among patients who had experienced progression during the initial 12 $\pm$ 3-month period)

Revision July 2020

Confidential

EUSTAR SSc-ILD Progression

was predicted by higher FVC (OR 1.02; 95% CI 1.00–1.04) and shorter disease duration (OR 1.00; 95% CI 1.00–1.02; Figure S1D). The only factor significantly predictive for cumulative progression over 5 years was higher baseline FVC (OR 1.01, 95% CI 1.00–1.02,  $p=0.01$ ).

There were no significant differences in mortality rate between patients with significant ILD progression (14/113 [12%]), moderate progression (15/106 [14%]), or stable ILD (36/408 [9%]) after 12±3 months.

Revision July 2020

Confidential

EUSTAR SSc-ILD Progression

**SUPPLEMENTARY TABLE S1:** Overall baseline demographics and clinical characteristics of all patients with SSc-ILD and those with three serial FVC measurements (who were included in the analyses) or without three serial measurements (who were not included).

|                                         | Included<br>(n=826) | Not included<br>(n=1433) | Overall<br>(N=2259) |
|-----------------------------------------|---------------------|--------------------------|---------------------|
| Age, years (SD)                         | 56 (13.1)           | 57 (13.4)                | 57 (13.3)           |
| Male, n (%)                             | 150 (18)            | 238 (17)                 | 388 (17)            |
| <b>Disease characteristics</b>          |                     |                          |                     |
| Disease duration, years (SD)            | 9.7 (8.3)           | 9.9 (8.3)                | 9.9 (8.3)           |
| Disease duration <3 years, n (%)        | 175 (21)            | 294 (21)                 | 469 (21)            |
| Diffuse cutaneous SSc, n (%)            | 365 (44)            | 599 (43)                 | 964 (44)            |
| Limited cutaneous SSc, n (%)            | 367 (44)            | 668 (48)                 | 1035 (47)           |
| Anti-topoisomerase I Ab, n (%)          | 421 (51)            | 700 (52)                 | 1121 (53)           |
| Anti-centromere Ab, n (%)               | 141 (17)            | 237 (18)                 | 378 (18)            |
| Anti-RNA polymerase III Ab, n (SD)      | 23 (3)              | 34 (5)                   | 57 (5)              |
| Follow-up period, years, mean (SD)      | 5.4 (2.0)           | 1.8 (2.2)                | 2.5 (2.3)           |
| <b>Lung characteristics</b>             |                     |                          |                     |
| FVC% predicted, mean (SD)               | 87 (21.1)           | 86 (22.0)                | 86 (21.7)           |
| DL <sub>co</sub> % predicted, mean (SD) | 59 (18.3)           | 59 (20.3)                | 59 (19.6)           |
| NYHA class, n (%)                       |                     |                          |                     |
| 1                                       | 363 (44)            | 527 (38)                 | 890 (41)            |
| 2                                       | 317 (38)            | 578 (42)                 | 895 (41)            |
| 3                                       | 103 (13)            | 236 (17)                 | 339 (16)            |
| 4                                       | 14 (2)              | 31 (2)                   | 45 (2)              |
| <b>Other characteristics</b>            |                     |                          |                     |
| mRSS, mean (SD)                         | 10 (8.1)            | 10 (8.9)                 | 10 (8.6)            |
| Reflux/dysphagia symptoms, n (%)        | 547 (66)            | 905 (64)                 | 1452 (65)           |
| Digital ulcers, n (%)                   | 266 (32)            | 410 (29)                 | 676 (30)            |
| Tendon friction rubs, n (%)             | 73 (9)              | 114 (8)                  | 187 (9)             |
| Synovitis, n (%)                        | 117 (14)            | 224 (16)                 | 341 (15)            |
| Muscle weakness, n (%)                  | 182 (22)            | 289 (20)                 | 465 (21)            |
| Scleroderma renal crisis, n (%)         | 11 (1)              | 24 (2)                   | 90 (2)              |
| ESR, mean (SD)                          | 26 (20.6)           | 26 (20.5)                | 26 (20.5)           |
| Elevated CRP, n (%)                     | 217 (26)            | 417 (31)                 | 634 (30)            |
| Immunosuppressant use, n (%)            | 89 (11)             | 220 (15)                 | 309 (14)            |

**Abbreviations:** Ab, antibody; CRP, C-reactive protein; DL<sub>co</sub>, diffusion capacity of the lungs for carbon monoxide; ESR, erythrocyte sedimentation rate; FVC, forced vital capacity; mRSS, modified Rodnan skin score; NYHA, New York Heart Association; SD, standard deviation; SSc, systemic sclerosis; SSc-ILD, systemic sclerosis-associated interstitial lung disease.

Revision July 2020

Confidential

EUSTAR SSc-ILD Progression

**SUPPLEMENTARY TABLE S2** Overall baseline demographic and clinical characteristics of patients with SSc-ILD and characteristics stratified by ILD progression (defined by FVC and DL<sub>CO</sub>) over the 12±3-month observation period

|                                                    | Total<br>(N=826) | Significant<br>progression<br>(n=113) | Moderate<br>progression<br>(n=106) | Stable<br>(n=408) | Moderate<br>improvement<br>(n=189) |
|----------------------------------------------------|------------------|---------------------------------------|------------------------------------|-------------------|------------------------------------|
| Progression criteria,<br>ΔFVC (ΔDL <sub>CO</sub> ) |                  | <-10, or<br>-10 to -5 (≤-15)          | -10 to -5<br>(>-15)                | >-5 to <5         | 5 to 10<br>(<15)                   |
| Age, years (SD)                                    | 56 (13.1)        | 59 (13.4)                             | 55 (12.1)                          | 55 (13.5)         | 58 (12.1)                          |
| Male, n (%)                                        | 150 (18)         | 18 (16)                               | 17 (16)                            | 81 (20)           | 34 (18.0)                          |
| <b>Disease characteristics at baseline</b>         |                  |                                       |                                    |                   |                                    |
| Disease duration,<br>years (SD)                    | 9.7 (8.3)        | 9.2 (7.6)                             | 9.6 (8.4)                          | 10.2 (8.3)        | 9.0 (8.6)                          |
| Disease duration <3<br>years, n (%)                | 175 (21)         | 27 (24)                               | 27 (26)                            | 70 (17)           | 50 (26.5)                          |
| Diffuse cutaneous SSc,<br>n (%)                    | 365 (44)         | 51 (45)                               | 45 (43)                            | 186 (46)          | 78 (41.3)                          |
| Limited cutaneous SSc,<br>n (%)                    | 367 (44)         | 58 (51)                               | 43 (41)                            | 180 (44)          | 81 (42.9)                          |
| Anti-topoisomerase I Ab,<br>n (%)                  | 421 (51)         | 48 (43)                               | 55 (54)                            | 222 (54)          | 93 (49.2)                          |
| Anti-centromere Ab,<br>n (%)                       | 141 (17)         | 19 (17)                               | 20 (19)                            | 60 (15)           | 40 (21.2)                          |
| Anti-RNA polymerase III<br>Ab, n (%)               | 23 (3)           | 3 (3)                                 | 3 (3)                              | 10 (3)            | 9.0 (8.6)                          |
| Total observation<br>period, years (SD)            | 5.4 (2.0)        | 5.5 (2.1)                             | 5.5 (2.1)                          | 5.4 (2.0)         | 5.0 (26.5)                         |
| <b>Lung characteristics</b>                        |                  |                                       |                                    |                   |                                    |
| FVC% predicted, mean<br>(SD)                       | 87 (21.1)        | 96 (23.1)                             | 89 (21.4)                          | 85 (20.6)         | 85.1 (19.5)                        |
| DL <sub>CO</sub> % predicted, mean<br>(SD)         | 59 (18.3)        | 62 (17.8)                             | 58 (16.5)                          | 58 (19.5)         | 59.0 (16.8)                        |
| ΔFVC% predicted,*<br>mean (SD)                     | -0.1<br>(10.2)   | -17 (8.0)                             | -7 (1.4)                           | 0.3 (2.5)         | 11.0 (7.3)                         |
| ΔDL <sub>CO</sub> % predicted,*<br>mean (SD)       | -0.7<br>(12.2)   | -7 (17.2)                             | 1 (10.0)                           | -0.4 (11.3)       | 2.4 (1.7)                          |
| Pulmonary<br>hypertension, n (%)                   | 162 (20)         | 21 (25)                               | 16 (15)                            | 6 (21)            | 30 (16)                            |
| NYHA class, n (%)                                  |                  |                                       |                                    |                   |                                    |
| 1                                                  | 363 (44)         | 53 (47)                               | 46 (43)                            | 175 (43)          | 89 (47)                            |
| 2                                                  | 317 (38)         | 44 (39)                               | 41 (39)                            | 154 (38)          | 77 (41)                            |
| 3                                                  | 103 (13)         | 12 (11)                               | 14 (13)                            | 52 (13)           | 24 (13)                            |
| 4                                                  | 14 (2)           | 3 (3)                                 | 1 (1)                              | 8 (2)             | 2 (1)                              |
| <b>Other characteristics</b>                       |                  |                                       |                                    |                   |                                    |
| mRSS, mean (SD)                                    | 10 (8.1)         | 11 (8.0)                              | 9 (8.3)                            | 10 (7.6)          | 9.9 (8.9)                          |

Revision July 2020

Confidential

EUSTAR SSc-ILD Progression

|                                  | <b>Total<br/>(N=826)</b> | <b>Significant<br/>progression<br/>(n=113)</b> | <b>Moderate<br/>progression<br/>(n=106)</b> | <b>Stable<br/>(n=408)</b> | <b>Moderate<br/>improvement<br/>(n=189)</b> |
|----------------------------------|--------------------------|------------------------------------------------|---------------------------------------------|---------------------------|---------------------------------------------|
| $\Delta$ mRSS, mean (SD)*        | -0.4 (4.6)               | 0.5 (4.2)                                      | -0.4 (3.2)                                  | -0.4 (4.6)                | -1.2 (5.3)                                  |
| Reflux/dysphagia symptoms, n (%) | 547 (66)                 | 87 (77)                                        | 68 (64)                                     | 268 (66)                  | 118 (62.4)                                  |
| Digital ulcers, n (%)            | 266 (32)                 | 43 (38)                                        | 28 (26)                                     | 144 (35)                  | 60 (32)                                     |
| Tendon friction rubs, n (%)      | 73 (9)                   | 8 (7)                                          | 8 (8)                                       | 36 (9)                    | 20 (11)                                     |
| Synovitis, n (%)                 | 117 (14)                 | 18 (16)                                        | 13 (12)                                     | 62 (15)                   | 23 (12)                                     |
| Muscle weakness, n (%)           | 182 (22)                 | 29 (26)                                        | 24 (23)                                     | 83 (20)                   | 47 (25)                                     |
| Scleroderma renal crisis, n (%)  | 11 (1)                   | 4 (4)                                          | 3 (3)                                       | 6 (2)                     | 1 (0.5)                                     |
| ESR, mean (SD)                   | 26 (20.6)                | 29 (23.8)                                      | 25 (21.9)                                   | 26 (19.0)                 | 25.9 (20.8)                                 |
| Elevated CRP, n (%)              | 217 (26)                 | 38 (34)                                        | 32 (30)                                     | 102 (25)                  | 47 (25)                                     |
| Immunosuppressant use, n (%)     | 88 (11)                  | 8 (7)                                          | 9 (9)                                       | 50 (12)                   | 21 (11)                                     |

\*Change from baseline to 12 months.

Significant progression (FVC decline of >10%, or FVC decline of 5–10% with DL<sub>CO</sub> decline of ≥15%); moderate progression (FVC decline of 5–10% with DL<sub>CO</sub> decline of <15%); stable ILD (FVC decline or improvement of <5%); moderate improvement (FVC improvement of 5–10% with DL<sub>CO</sub> improvement of <15%).

**Abbreviations:** Ab, antibody; CRP, C-reactive protein; DL<sub>CO</sub>, diffusion capacity of the lungs for carbon monoxide; ESR, erythrocyte sedimentation rate; FVC, forced vital capacity; mRSS, modified Rodnan skin score; NYHA, New York Heart Association; SD, standard deviation; SSc, systemic sclerosis; SSc-ILD, systemic sclerosis-associated interstitial lung disease.

Revision July 2020

Confidential

EUSTAR SSC-ILD Progression

**SUPPLEMENTARY FIGURE S1** Variables predictive for progression in patients during the 12±3-month observation period in (A) univariable and (B) multivariable logistic regression; and variables predictive for further progression over the 5-year follow-up in patients with progression during the 12±3-month observation period in (C) univariable and (D) multivariable logistic regression.

Significant progression was defined as FVC decline of >10%, or FVC decline of 5–10% with DL<sub>CO</sub> decline of ≥15%.

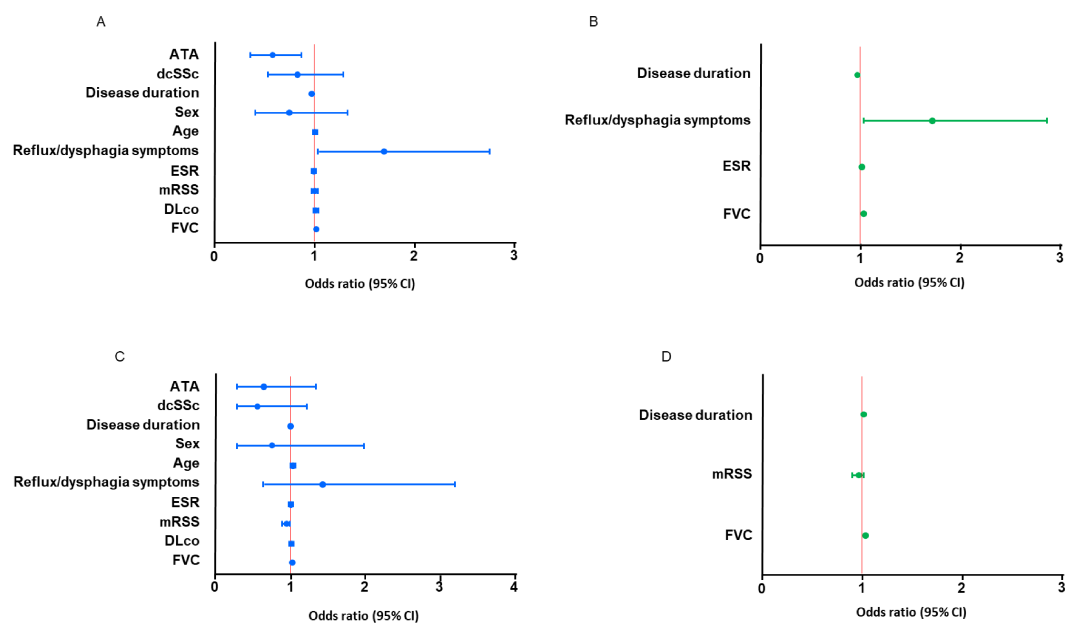

**Abbreviations:** ATA, anti-topoisomerase A antibody; CI, confidence interval; dcSSc, diffuse cutaneous systemic sclerosis; DL<sub>CO</sub>, diffusion capacity of the lungs for carbon monoxide; ESR, erythrocyte sedimentation rate; FVC, forced vital capacity; mRSS, modified Rodnan skin score.

Revision July 2020

Confidential

EUSTAR SSC-ILD Progression

**Appendix:**  
**List of EUSTAR Collaborators**

|                                  |                                              |
|----------------------------------|----------------------------------------------|
| <b>Marco Matucci Cerinic</b>     | Florence (Italy)                             |
| <b>Ulrich Walker</b>             | Basel (Switzerland)                          |
| <b>Florenzo Iannone</b>          | Bari (Italy)                                 |
| <b>Radim Becvar</b>              | Prague (Czech Republic)                      |
| <b>Gabriele Valentini</b>        | Naples (Italy)                               |
| <b>Elise Siegert</b>             | Berlin (Germany)                             |
| <b>C. Montecucco</b>             | Pavia (Italy)                                |
| <b>Patricia E. Carreira</b>      | Madrid (Spain)                               |
| <b>Carlo Chizzolini</b>          | Geneva (Switzerland)                         |
| <b>Eugene J. Kucharz</b>         | Katowice (Poland)                            |
| <b>Andrea Doria</b>              | Padova (Italy)                               |
| <b>Pr Dominique Farge Bancel</b> | Paris (France)                               |
| <b>Roger Hesselstrand</b>        | Lund (Sweden)                                |
| <b>Alexandra Balbir-Gurman</b>   | Haifa (Israel)                               |
| <b>Raffaele Pellerito</b>        | Torino (Italy)                               |
| <b>Cristian Caimmi</b>           | Verona (Italy)                               |
| <b>Christopher Denton</b>        | London (United Kingdom)                      |
| <b>Nemanja Damjanov</b>          | Belgrade (Serbia & Montenegro)               |
| <b>Jörg Henes</b>                | Tübingen (Germany)                           |
| <b>Vera Ortiz-Santamaria</b>     | Granollers Barcelona (Spain)                 |
| <b>Stefan Heitmann</b>           | Stuttgart (Germany)                          |
| <b>Maria João Salvador</b>       | Coimbra (Portugal)                           |
| <b>Bojana Stamenkovic</b>        | Niska Banja (Serbia and Montenegro)          |
| <b>Carlo Francesco Selmi</b>     | Rozzano, Milano (Italy)                      |
| <b>Ariane Herrick</b>            | Salford (United Kingdom)                     |
| <b>Ulf Müller-Ladner</b>         | Bad Nauheim (Germany)                        |
| <b>Merete Engelhart</b>          | Hellerup (Denmark)                           |
| <b>Valeria Riccieri</b>          | Roma (Italy)                                 |
| <b>Ruxandra Maria Ionescu</b>    | Bucharest (Romania)                          |
| <b>Ana Maria Gheorghiu</b>       | Bucharest (Romania)                          |
| <b>Cord Sunderkötter</b>         | Münster (Germany)                            |
| <b>Jörg Distler</b>              | Erlangen (Germany)                           |
| <b>Francesca Ingegnoli</b>       | Milano (Italy)                               |
| <b>Luc Mouthon</b>               | Paris (France)                               |
| <b>Vanessa Smith</b>             | Gent (Belgium)                               |
| <b>Francesco Paolo Cantatore</b> | Foggia (Italy)                               |
| <b>Susanne Ullman</b>            | Copenhagen (Denmark)                         |
| <b>Maria Rosa Pozzi</b>          | Monza (Italy)                                |
| <b>Piotr Wiland</b>              | Wroclaw (Poland)                             |
| <b>Marie Vanthuyne</b>           | Brussels (Belgium)                           |
| <b>Brigitte<br/>Petra Saar</b>   | <b>Krummel-Lorenz</b><br>Frankfurt (Germany) |

Revision July 2020

Confidential

EUSTAR SSC-ILD Progression

|                                                            |                     |                               |
|------------------------------------------------------------|---------------------|-------------------------------|
| <b>Kristine Herrmann</b>                                   |                     | Dresden (Germany)             |
| <b>Ellen De Langhe</b>                                     |                     | Leuven (Belgium)              |
| <b>Branimir Marko Miroslav Mayer</b>                       | <b>Anic Baresic</b> | Zagreb (Croatia)              |
| <b>Sule Yavuz</b>                                          |                     | Altunizade-Istanbul (Turkey)  |
| <b>Carolina de Souza Müller</b>                            |                     | Curitiba (Brasil)             |
| <b>Thierry Zenone</b>                                      |                     | Valence (France)              |
| <b>Alessandro Alessandra Vacca</b>                         | <b>Mathieu</b>      | Monserrato (CA) (Italy)       |
| <b>Kamal Solanki</b>                                       |                     | Hamilton (New Zealand)        |
| <b>Edoardo Rosato</b>                                      |                     | Roma (Italy)                  |
| <b>Fahrettin Figen Yargucu</b>                             | <b>Oksel</b>        | Bornova, Izmir (Turkey)       |
| <b>Cristina-Mihaela Tanaseanu</b>                          |                     | Bucharest (Romania)           |
| <b>Rosario Foti</b>                                        |                     | Catania (Italy)               |
| <b>Daniel E. Furst</b>                                     |                     | Los Angeles (USA)             |
| <b>Peter Sabine Adler</b>                                  | <b>Villiger</b>     | Bern (Switzerland)            |
| <b>Paloma García de la Peña Jorge Juan González Martín</b> | <b>Lefebvre</b>     | Madrid (Spain)                |
| <b>Ira Litinsky</b>                                        |                     | Tel-Aviv (Israel)             |
| <b>Francesco Del Galdo</b>                                 |                     | Leeds (United Kingdom)        |
| <b>Goda Seskute</b>                                        |                     | Vilnius (Lithuania)           |
| <b>Lesley Ann Saketkoo</b>                                 |                     | New Orleans (USA)             |
| <b>Eduardo Kerzberg</b>                                    |                     | Buenos Aires (Argentina)      |
| <b>Ivan Castellví</b>                                      |                     | Barcelona (Spain)             |
| <b>François Spertini</b>                                   |                     | Lausanne (Switzerland)        |
| <b>Vivien M. Hsu</b>                                       |                     | New Brunswick (USA)           |
| <b>Thierry Martin</b>                                      |                     | Strasbourg (France)           |
| <b>Tim Schmeiser</b>                                       |                     | Wuppertal-Elberfeld (Germany) |
| <b>Dominik Majewski</b>                                    |                     | Poznan (Poland)               |
| <b>Vera Bernardino</b>                                     |                     | Lisboa (Portugal)             |
| <b>Piercarlo Sarzi Puttini</b>                             |                     | Milano (Italy)                |
